# Supplementary material
Source: PubMed Central journal article supplement (PMC2427281)
Supplement: mmc1.pdf [file mmc1.pdf]

## Supplemental Data

### A Bayesian Evaluation

### of Human Mitochondrial Substitution Rates

Phillip Endicott and Simon Y.W. Ho

**Table S1. List of Published Date Estimates Used as Data Points in Figure 2**

| Study                                      | Estimated Age of Human MRCA (kyr) | Calibration            |
|--------------------------------------------|-----------------------------------|------------------------|
| Cann et al. (1987) <sup>1</sup>            | 143–285                           | Intraspecific          |
| Vigilant et al. (1989) <sup>2</sup>        | 476                               | Human-chimpanzee split |
| Hasegawa and Horai (1991) <sup>3</sup>     | 280                               | Human-chimpanzee split |
| Vigilant et al. (1991) <sup>4</sup>        | 166–249                           | Human-chimpanzee split |
| Nei (1992) <sup>5</sup>                    | 110–504                           | Human-chimpanzee split |
| Nei (1992) <sup>5</sup>                    | 760                               | Human-chimpanzee split |
| Pesole et al. (1992) <sup>6</sup>          | 400                               | Human-chimpanzee split |
| Pesole et al. (1992) <sup>6</sup>          | 600                               | Human-chimpanzee split |
| Stoneking et al. (1992) <sup>7</sup>       | 133                               | Intraspecific          |
| Stoneking et al. (1992) <sup>7</sup>       | 137                               | Intraspecific          |
| Hasegawa et al. (1993) <sup>8</sup>        | 211                               | Human-chimpanzee split |
| Ruvolo et al. (1993) <sup>9</sup>          | 195                               | Human-chimpanzee split |
| Ruvolo et al. (1993) <sup>9</sup>          | 298                               | Human-chimpanzee split |
| Ruvolo et al. (1993) <sup>9</sup>          | 506                               | Human-chimpanzee split |
| Horai et al. (1995) <sup>10</sup>          | 450                               | Human-orangutan split  |
| Horai et al. (1995) <sup>10</sup>          | 143                               | Human-orangutan split  |
| Wills (1995) <sup>11</sup>                 | 436                               | Human-chimpanzee split |
| Wills (1995) <sup>11</sup>                 | 806                               | Human-chimpanzee split |
| Krings et al. (1997) <sup>12</sup>         | 120–150                           | Human-chimpanzee split |
| Parsons et al. (1997) <sup>13</sup>        | 6.5                               | Pedigree rate          |
| Krings et al. (1999) <sup>14</sup>         | 163                               | Human-chimpanzee split |
| Arnason et al. (2000) <sup>15</sup>        | 170                               | Human-chimpanzee split |
| Arnason et al. (2000) <sup>15</sup>        | 400                               | Human-chimpanzee split |
| Ingman et al. (2000) <sup>16</sup>         | 171.5                             | Human-chimpanzee split |
| Ingman and Gyllensten (2001) <sup>17</sup> | 167–171                           | Human-chimpanzee split |
| Tang et al. (2002) <sup>18</sup>           | 214                               | Human-chimpanzee split |
| Mishmar et al. (2003) <sup>19</sup>        | 198                               | Human-chimpanzee split |
| Kivisild et al. (2006) <sup>20</sup>       | 160                               | Human-chimpanzee split |

**Table S2. List of GenBank Accession Numbers for Sequences Used in This Study**

| Haplogroup | GenBank Accession                               | Haplogroup | GenBank Accession |
|------------|-------------------------------------------------|------------|-------------------|
| Chimpanzee | X93335                                          | M39        | AY922275          |
| Chimpanzee | CHPMTB                                          | M40        | AY922294          |
| E          | Pending, Soares et al. (in press) <sup>21</sup> | M5         | AY922292          |
| E          | Pending, Soares et al. (in press) <sup>21</sup> | M5a        | AY922260          |
| H1         | AY738972                                        | M5a        | AY922285          |
| H1         | AY738981                                        | M5a        | AY922289          |
| H1         | AY738982                                        | M6         | AY922296          |
| H1         | AY738973                                        | M6         | AY922307          |
| H1         | AY738974                                        | Mstar      | AY922302          |
| H1         | AY738975                                        | Mstar      | AY922299          |

|        |          |         |          |
|--------|----------|---------|----------|
| H1     | AY738976 | Mstar   | AY922300 |
| H1     | AY738977 | Mstar   | AY922253 |
| H1     | AY738978 | Mstar   | DQ404442 |
| H1     | AY738979 | Mstar   | DQ404443 |
| H1     | AY738980 | N12a    | AY289058 |
| H3     | AY738984 | N12b    | AY289059 |
| H3     | AY738985 | N13     | EF495214 |
| H3     | AY738986 | N1d     | AY714008 |
| H3     | AY738987 | N5      | AY714031 |
| H3     | AY738988 | O       | DQ404447 |
| H3     | AY738989 | P1a1a1b | AY289087 |
| H3     | AY738990 | P1a1a2  | AY289092 |
| H3     | AY738991 | P1a2    | AY289086 |
| H3     | AY738992 | P1b1    | AY289084 |
| I1     | AY714041 | P2      | EF495215 |
| L0     | AF346985 | P2a     | AY289076 |
| L0     | AF346998 | P2a     | AY289080 |
| L0     | AF346999 | P2a2    | AY289052 |
| L0     | AF347008 | P2b     | AY289091 |
| L0     | AF347009 | P3      | AY289083 |
| L1     | AF346968 | P3a     | AY289053 |
| L1     | AF346969 | P3b     | AY289055 |
| L1     | AF346986 | P4a     | AY289057 |
| L1     | AF346987 | P4b2    | AY289064 |
| L1     | AF346992 | P5      | AY289063 |
| L1     | AF346996 | P6      | AY289054 |
| L1     | AF346997 | P8      | EF495221 |
| L1     | AY195780 | P9      | DQ404446 |
| L1a2   | AY195777 | Q       | EF495218 |
| L1b1   | AY195789 | Q       | AY289085 |
| L1b2   | AY195783 | Q1      | AY289077 |
| L2     | AF346976 | Q1a1    | AY289090 |
| L2     | AF346977 | Q1a2a   | AY289082 |
| L2     | AF346995 | Q1a2b   | AY289075 |
| L2a    | AY195776 | Q2a     | AY956412 |
| L2a1   | AY195788 | Q2b1    | AY289079 |
| L2b    | AY195766 | Q2b2    | AY289089 |
| L2c    | AY195785 | Q2c     | AY956414 |
| M13    | EF495219 | Q3      | AY289081 |
| M14    | EF495222 | R1      | AY714045 |
| M2     | AY922305 | R14     | EF495216 |
| M27    | DQ137411 | R2      | AY714007 |
| M27a   | DQ137410 | R30     | AY714001 |
| M27b   | DQ137402 | R30     | AY714032 |
| M27b   | DQ137403 | R30     | AY714047 |
| M27b   | DQ137404 | R30     | AY714050 |
| M27c   | DQ137405 | R31     | AY714046 |
| M27c   | DQ137406 | R5      | AY713983 |
| M28a   | DQ137400 | R5      | AY713984 |
| M28a   | DQ137401 | R5      | AY713985 |
| M28b   | DQ137398 | R5      | AY713991 |
| M28b   | DQ137399 | R5      | AY713993 |
| M29    | DQ137408 | R6      | AY713994 |
| M29    | DQ137409 | R6      | AY714028 |
| M29    | DQ137407 | R7      | AY714024 |
| M29    | EF495217 | R7      | AY714030 |
| M2a    | AY922306 | R8      | AY714009 |
| M3     | AY922263 | R8      | AY714011 |
| M3     | AY922266 | S1      | DQ404441 |
| M31a1a | AY950298 | S1      | DQ404440 |

|          |                                                |     |          |
|----------|------------------------------------------------|-----|----------|
| M31a1b   | Pending, Barik et al. (in press) <sup>22</sup> | S1a | AF346963 |
| M31a1b1  | Pending, Barik et al. (in press) <sup>22</sup> | S2  | AY289051 |
| M31a1b2  | AY950293                                       | S2  | AY289060 |
| M31a1b2a | AY950294                                       | S2d | AY289061 |
| M31a2    | EF060263                                       | S4  | EF495220 |
| M31a2a1  | EF060264                                       | S4  | AY289062 |
| M31a2a2  | EF060262                                       | S4  | AY289066 |
| M31a2a3  | EF060265                                       | U1a | AY714038 |
| M31b     | N/A, Palanichamy et al. (2004) <sup>23</sup>   | U2a | AY713990 |
| M32a     | AY950296                                       | U2a | AY713992 |
| M32b     | DQ149518                                       | U2b | AY714020 |
| M32b     | AY950295                                       | U2b | AY714025 |
| M33      | AY922276                                       | U2c | AY714010 |
| M34      | AY922304                                       | U2e | AY714026 |
| M34      | AY922274                                       | U3  | AY714023 |
| M35      | AY922279                                       | U7  | AY714004 |
| M35      | AY922272                                       | W1  | AY714018 |
| M36      | AY922284                                       | W1c | AY714039 |
| M39      | AY922269                                       | W3  | AY714043 |
| M39      | AY922288                                       |     |          |

**Table S3. List of Codons Classified as Being under Selection at a Significance Level of 5%, with Corresponding p Values**

| Gene                              | Codon Number | CRS Sites   | dN:dS | p Value |
|-----------------------------------|--------------|-------------|-------|---------|
| <i>Positively Selected Codons</i> |              |             |       |         |
| ND2                               | 2306         | 5454–5456   | 5.00  | 0.017   |
| <i>Negatively Selected Codons</i> |              |             |       |         |
| ATP8                              | 239          | 8402–8404   | –3.12 | 0.033   |
| COX1                              | 366          | 6162–6164   | –3.12 | 0.033   |
| COX1                              | 385          | 6219–6221   | –3.00 | 0.037   |
| COX1                              | 398          | 6258–6260   | –3.13 | 0.033   |
| COX1                              | 551          | 6717–6719   | –3.00 | 0.037   |
| COX1                              | 556          | 6732–6734   | –3.13 | 0.033   |
| COX1                              | 587          | 6825–6827   | –3.00 | 0.037   |
| COX1                              | 757          | 7335–7337   | –3.00 | 0.038   |
| COX2                              | 981          | 8147–8149   | –3.00 | 0.037   |
| COX2                              | 1014         | 8246–8248   | –6.00 | 0.014   |
| COX3                              | 1202         | 9747–9749   | –4.18 | 0.011   |
| CYTB                              | 1402         | 15107–15109 | –3.00 | 0.037   |
| CYTB                              | 1625         | 15776–15778 | –3.00 | 0.037   |
| ND2                               | 2121         | 4899–4901   | –3.00 | 0.037   |
| ND2                               | 2201         | 5139–5141   | –3.00 | 0.037   |
| ND2                               | 2231         | 5229–5231   | –4.00 | 0.012   |
| ND4                               | 2822         | 11903–11905 | –4.00 | 0.013   |
| ND4L                              | 2969         | 10677–10679 | –3.00 | 0.037   |
| ND5                               | 3018         | 12403–12405 | –4.00 | 0.012   |
| ND5                               | 3173         | 12868–12870 | –4.00 | 0.012   |
| ND5                               | 3220         | 13009–13011 | –4.00 | 0.012   |
| ND5                               | 3307         | 13270–13272 | –3.00 | 0.037   |
| ND5                               | 3380         | 13489–13491 | –4.00 | 0.012   |

**Supplemental References**

1. Cann RL, Stoneking M, Wilson AC (1987) Mitochondrial DNA and human evolution. *Nature* 325:31–36.
2. Vigilant L, Pennington R, Harpending H, Kocher TD, Wilson AC (1989) Mitochondrial DNA sequences in single hairs from a southern African population. *Proc Natl Acad Sci USA* 86:9350–9354.
3. Hasegawa M, Horai S (1991) Time of the deepest root for polymorphism in human mitochondrial DNA. *J Mol Evol* 32:37–42.
4. Vigilant L, Stoneking M, Harpending H, Hawkes K, Wilson AC (1991) African populations and the evolution of human mitochondrial DNA. *Science* 253:1503–1507.
5. Nei M (1992) Age of the common ancestor of human mitochondrial DNA. *Mol Biol Evol* 9:1176–1178.
6. Pesole G, Sbisà E, Preparata G, Saccone C (1992) The evolution of the mitochondrial D-loop region and the origin of modern man. *Mol Biol Evol* 9:587–598.
7. Stoneking M, Sherry ST, Redd AJ, Vigilant L (1992) New approaches to dating suggest a recent age for human mtDNA ancestor. *Phil Trans R Soc Lond B* 337:167–175.
8. Hasegawa M, Di Rienzo A, Kocher TD, Wilson AC (1993) Toward a more accurate time scale for the human mitochondrial DNA tree. *J Mol Evol* 37:347–354.
9. Ruvolo M, Zehr S, von Dornum M, Pan D, Chang B, Lin J (1993) Mitochondrial COII sequences and modern human origins. *Mol Biol Evol* 10:1115–1135.
10. Horai S, Hayasaka K, Tsugane K, Takhata N (1995) Recent African origin of modern humans revealed by complete sequences of hominoid mitochondrial DNAs. *Proc Natl Acad Sci USA* 92:532–536.
11. Wills C (1995) When did Eve live? An evolutionary detective story. *Evolution* 49:593–607.
12. Krings M, Stone AC, Schmitz RW, Krainitzki H, Stoneking M, Pääbo S (1997) Neandertal DNA sequences and the origin of modern humans. *Cell* 90:19–30.
13. Parsons TJ, Muniec DS, Sullivan K, Woodyatt N, Alliston-Greiner R, Wilson MR, Berry DL, Holland KA, Weedn VW, Gill P, et al (1997) A high observed substitution rate in the human mitochondrial DNA control region. *Nat Genet* 15:363–368.
14. Krings M, Geisert H, Schmitz RW, Krainitzki H, Pääbo S (1999) DNA sequence of the mitochondrial hypervariable region II from the neandertal type specimen. *Proc Natl Acad Sci USA* 96:5581–5585.
15. Arnason U, Gullberg A, Burguete AS, Janke A (2000) Molecular estimates of primate divergences and new hypotheses for primate dispersal and the origin of modern humans. *Hereditas* 133:217–28.
16. Ingman M, Kaessmann H, Paabo S, Gyllensten U (2000) Mitochondrial genome variation and the origin of modern humans. *Nature* 408:708–713.
17. Ingman M, Gyllensten U (2001) Analysis of the complete human mtDNA genome: methodology and inferences for human evolution. *J Hered* 92:454–461.
18. Tang H, Siegmund DO, Shen P, Oefner PJ, Feldman MW (2002) Frequentist estimation of coalescence times from nucleotide sequence data using a tree-based partition. *Genetics* 161:447–459.
19. Mishmar D, Ruiz-Pesini E, Golik P, Macaulay V, Clark AG, Hosseini S, Brandon M, Easley K, Chen E, Brown MD, et al (2003) Natural selection shaped regional mtDNA variation in humans. *Proc Natl Acad Sci USA* 100:171–176.
20. Kivisild T, Shen P, Wall DP, Do B, Sung R, Davis K, Passarino G, Underhill PA, Scharfe C, Torroni A, et al (2006) The role of selection in the evolution of human mitochondrial genomes. *Genetics* 172:373–387.
21. Soares P, Trejaut JA, Loo J-H, Hill C, Mormina M, Lee C-L, Chen Y-M, Hudjashov G, Forster P, Macaulay V, Bulbeck D, Oppenheimer S, Lin M, and Richards MB (2008) Climate change and post-glacial human dispersals in Southeast Asia. *Molecular Biology and Evolution*, in press.
22. Barik SS, Sahani R, Prasad BVR, Endicott P, Metspalu M, Bhattacharya S, Sarkar BN, Annapoorna PCH, Sreenath J, Sun D, Sanchez JJ, Ho SYW, Chandrasekar A, and Rao VR. Detailed mtDNA genotypes permit a reassessment of the settlement and population structure of the Andaman Islands. *American Journal of Physical Anthropology*, in press.
23. Palanichamy MG, Sun C, Agrawal S, Bandelt HJ, Kong QP, Khan F, Wang CY, Chaudhuri TK, Palla V, Zhang YP. (2004). Phylogeny of mitochondrial DNA macrohaplogroup N in India, based on complete sequencing: implications for the peopling of South Asia. *American Journal of Human Genetics* 75:966-978.
